# Supplementary material
Source: publisher figshare collection journal article supplement (https://acs.figshare.com/ndownloader/files/15164210)
Supplement: Supplementary file 1 [file 15164210]

## Li-Functionalized Carbon Nanotubes for Hydrogen Storage: Importance of Size Effects

Ekaterina Anikina<sup>†,‡</sup>, Amitava Banerjee<sup>\*‡</sup>, Valery Beskachko<sup>‡</sup>, Rajeev Ahuja<sup>†,‡</sup>

<sup>†</sup> Materials Theory Division, Department of Physics and Astronomy, Uppsala University, Box 516, 75120, Sweden

<sup>‡</sup> Institute of Natural Sciences and Mathematics, South Ural State University, 76, Lenin Prospekt, Chelyabinsk 454080, Russia

<sup>‡</sup> Applied Materials Physics, Department of Materials and Engineering, KTH Royal Institute of Technology, S-100 44 Stockholm, Sweden

**Corresponding Author:**

\*(AB) E-mail: amitava245@gmail.com

Supplementary figures

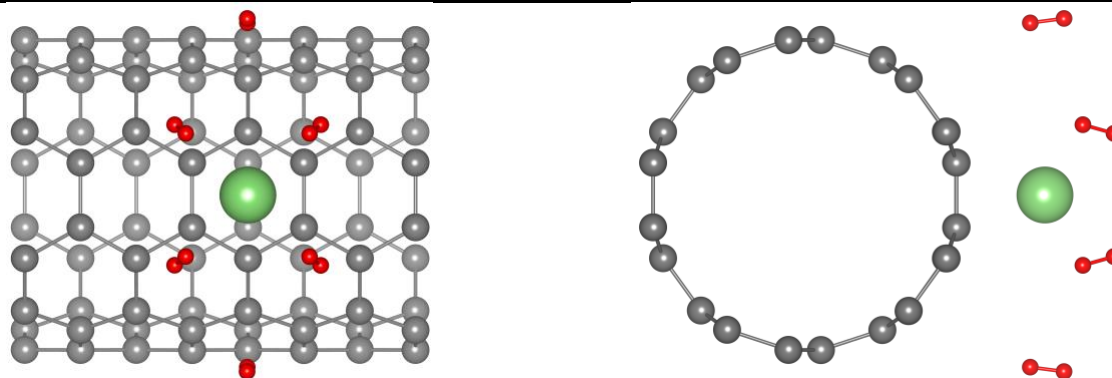

Figure S1. Configuration S+2 of the complex CNT(5,5)@Li+6H<sub>2</sub> (external sorption,  $N_c = 4$ ). C, Li, and H atoms are gray, green, and red, respectively.

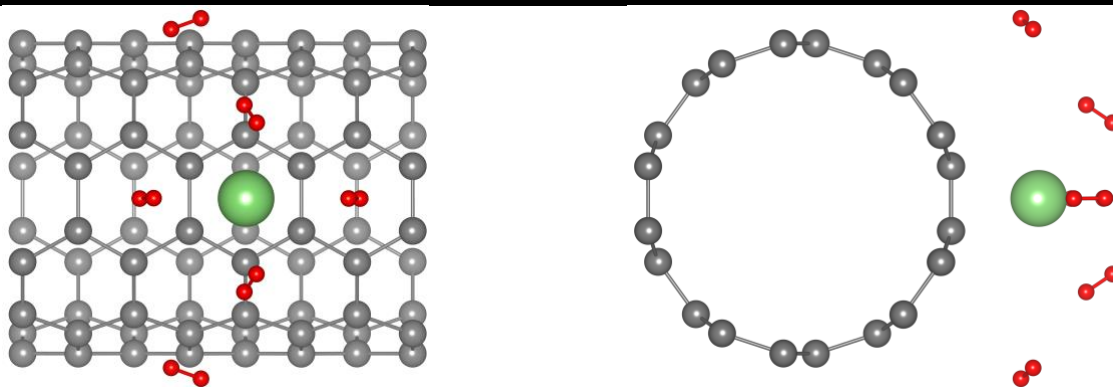

Figure S2. Configuration R+2 of the complex CNT (5,5)@Li+6H<sub>2</sub> (external sorption, N<sub>c</sub>=4). C, Li, and H atoms are gray, green, and red, respectively.

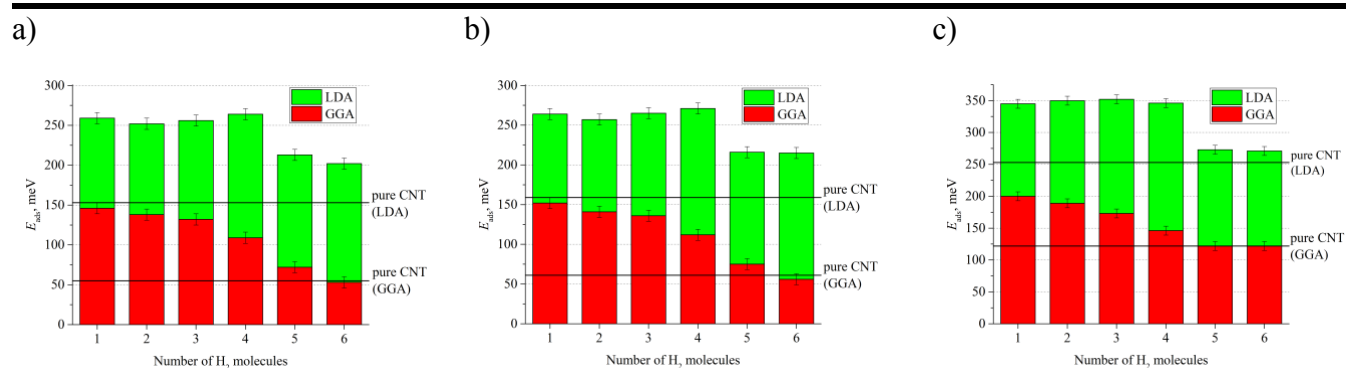

Figure S3. Hydrogen adsorption energies in the case of (a) external sorption on CNT(7,7)@Li; (b) external sorption on CNT(9,9)@Li; (c) internal sorption on CNT(9,9)@Li. GGA and LDA results are noted by red and green color, respectively. Adsorption energies on pure CNTs are noted by solid lines (for both GGA and LDA calculations).

## Supplementary tables

Table S1. E<sub>bind</sub> (meV) of H<sub>2</sub> Molecule in Complexes CNT(7,7)+kH<sub>2</sub> and CNT(7,7)@Li+kH<sub>2</sub> Calculated in GGA, DFT-D2, and LDA

| <i>k</i> | CNT(7,7)@Li      |        |     |                  |        |     | CNT(7,7)         |        |     |                  |        |     |
|----------|------------------|--------|-----|------------------|--------|-----|------------------|--------|-----|------------------|--------|-----|
|          | external surface |        |     | internal surface |        |     | external surface |        |     | internal surface |        |     |
|          | GGA              | DFT-D2 | LDA |
| 1        | 146              | 269    | 259 | 218              | 393    | 379 | 55               | 114    | 153 | 140              | 252    | 287 |
| 2        | 143              | 264    | 252 | 204              | 378    | 386 | —                | —      | —   | —                | —      | —   |
| 3        | 126              | 247    | 256 | 189              | 370    | 373 | —                | —      | —   | —                | —      | —   |
| 4        | 85               | 203    | 264 | 155              | 282    | 367 | —                | —      | —   | —                | —      | —   |
